# Supplementary material
Source: MDPI journal article supplement (https://www.mdpi.com/2073-4395/11/10/1908)
Supplement: s1 [file s1]

## Supplemental Materials

**Table S1.** Gene Ontology (GO) terms enriched within the sets of significantly ( $FDR < 0.05$ ) differentially expressed genes (DEGs) between reciprocal hybrid pairs with significant reciprocal effects (ST8-2/GY14-15 and ST8-4x/9930-3) and no reciprocal effects (controls; ST8-4/TMG1-5 and GY14-15/ST8-4) compared to number of genes represented in reference set (Ref) of all detected genes across samples in the experiment. Significance was tested based on Fisher's exact test with the false discovery rate (FDR) correction.

| <i>Significant reciprocal effects: ST8-2xGY14-15 vs GY14-15xST8-2</i> |                                                                        |                  |                |                 |                              |
|-----------------------------------------------------------------------|------------------------------------------------------------------------|------------------|----------------|-----------------|------------------------------|
| Domain*                                                               | GO Term                                                                | Ref<br>(#/20429) | DEGs<br>(#/33) | Raw p-<br>value | Adjusted<br>p-value<br>(FDR) |
| BP                                                                    | negative regulation of endopeptidase activity (GO:0010951)             | 35               | 4              | 4.43E-07        | 2.05E-03                     |
| BP                                                                    | negative regulation of peptidase activity (GO:0010466)                 | 35               | 4              | 4.43E-07        | 1.03E-03                     |
| BP                                                                    | negative regulation of proteolysis (GO:0045861)                        | 35               | 4              | 4.43E-07        | 6.84E-04                     |
| BP                                                                    | regulation of endopeptidase activity (GO:0052548)                      | 36               | 4              | 4.92E-07        | 5.69E-04                     |
| BP                                                                    | regulation of peptidase activity (GO:0052547)                          | 37               | 4              | 5.44E-07        | 5.04E-04                     |
| BP                                                                    | regulation of proteolysis (GO:0030162)                                 | 64               | 4              | 4.24E-06        | 3.28E-03                     |
| BP                                                                    | negative regulation of hydrolase activity (GO:0051346)                 | 65               | 4              | 4.50E-06        | 2.98E-03                     |
| BP                                                                    | negative regulation of cellular protein metabolic process (GO:0032269) | 105              | 4              | 2.77E-05        | 1.60E-02                     |
| BP                                                                    | negative regulation of protein metabolic process (GO:0051248)          | 105              | 4              | 2.77E-05        | 1.42E-02                     |

| BP                                                                  | negative regulation of catalytic activity (GO:0043086)        | 146              | 4               | 9.62E-05    | 4.46E-02 |
|---------------------------------------------------------------------|---------------------------------------------------------------|------------------|-----------------|-------------|----------|
| BP                                                                  | negative regulation of molecular function (GO:0044092)        | 148              | 4               | 1.01E-04    | 4.27E-02 |
| BP                                                                  | regulation of hydrolase activity (GO:0051336)                 | 156              | 4               | 1.23E-04    | 4.77E-02 |
| MF                                                                  | cysteine-type endopeptidase inhibitor activity (GO:0004869)   | 17               | 3               | 4.28E-06    | 2.09E-03 |
| MF                                                                  | endopeptidase inhibitor activity (GO:0004866)                 | 35               | 4               | 4.43E-07    | 1.08E-03 |
| MF                                                                  | peptidase inhibitor activity (GO:0030414)                     | 35               | 4               | 4.43E-07    | 5.40E-04 |
| MF                                                                  | endopeptidase regulator activity (GO:0061135)                 | 36               | 4               | 4.92E-07    | 4.00E-04 |
| MF                                                                  | peptidase regulator activity (GO:0061134)                     | 37               | 4               | 5.44E-07    | 3.32E-04 |
| MF                                                                  | enzyme inhibitor activity (GO:0004857)                        | 139              | 4               | 7.99E-05    | 3.25E-02 |
| CC                                                                  | No significant results                                        |                  |                 |             |          |
| <i>Significant reciprocal effects: ST8-4x9930-3 vs 9930-3xST8-4</i> |                                                               |                  |                 |             |          |
| Domain                                                              | GO Term                                                       | Ref<br>(#/20429) | DEGs<br>(#/153) | Raw p-value | FDR      |
| BP                                                                  | photorespiration (GO:0009853)                                 | 12               | 3               | 1.72E-04    | 4.68E-02 |
| BP                                                                  | regulation of transcription by RNA polymerase II (GO:0006357) | 379              | 12              | 3.72E-05    | 1.43E-02 |
| BP                                                                  | regulation of transcription, DNA-templated (GO:0006355)       | 1308             | 27              | 1.79E-06    | 8.31E-03 |

|    |                                                                             |      |    |          |          |
|----|-----------------------------------------------------------------------------|------|----|----------|----------|
| BP | regulation of RNA biosynthetic process (GO:2001141)                         | 1318 | 27 | 2.07E-06 | 4.79E-03 |
| BP | regulation of nucleic acid-templated transcription (GO:1903506)             | 1318 | 27 | 2.07E-06 | 3.19E-03 |
| BP | regulation of RNA metabolic process (GO:0051252)                            | 1372 | 27 | 4.31E-06 | 5.00E-03 |
| BP | regulation of nucleobase-containing compound metabolic process (GO:0019219) | 1409 | 27 | 6.98E-06 | 6.46E-03 |
| BP | regulation of cellular macromolecule biosynthetic process (GO:2000112)      | 1437 | 27 | 9.91E-06 | 7.65E-03 |
| BP | regulation of macromolecule biosynthetic process (GO:0010556)               | 1449 | 27 | 1.15E-05 | 7.60E-03 |
| BP | regulation of cellular biosynthetic process (GO:0031326)                    | 1463 | 27 | 1.36E-05 | 7.88E-03 |
| BP | regulation of biosynthetic process (GO:0009889)                             | 1467 | 27 | 2.37E-05 | 1.22E-02 |
| BP | regulation of gene expression (GO:0010468)                                  | 1596 | 28 | 2.61E-05 | 1.10E-02 |
| BP | regulation of nitrogen compound metabolic process (GO:0051171)              | 1690 | 29 | 2.53E-05 | 1.17E-02 |
| BP | regulation of primary metabolic process (GO:0080090)                        | 1710 | 29 | 4.92E-05 | 1.75E-02 |
| BP | regulation of cellular metabolic process (GO:0031323)                       | 1760 | 29 | 6.29E-05 | 2.08E-02 |
| BP | regulation of macromolecule metabolic process (GO:0060255)                  | 1873 | 30 | 6.55E-05 | 2.02E-02 |

|    |                                                                                                    |      |    |          |          |
|----|----------------------------------------------------------------------------------------------------|------|----|----------|----------|
| BP | regulation of metabolic process<br>(GO:0019222)                                                    | 1928 | 30 | 1.32E-04 | 3.83E-02 |
| MF | RNA polymerase II cis-regulatory<br>region sequence-specific DNA<br>binding (GO:0000978)           | 157  | 11 | 5.29E-08 | 3.23E-05 |
| MF | cis-regulatory region sequence-<br>specific DNA binding<br>(GO:0000987)                            | 158  | 11 | 5.63E-08 | 2.29E-05 |
| MF | RNA polymerase II transcription<br>regulatory region sequence-specific<br>DNA binding (GO:0000977) | 174  | 11 | 1.42E-07 | 3.46E-05 |
| MF | DNA-binding transcription factor<br>activity, RNA polymerase II-<br>specific (GO:0000981)          | 192  | 12 | 4.23E-08 | 3.44E-05 |
| MF | regulatory region nucleic acid<br>binding (GO:0001067)                                             | 301  | 14 | 1.03E-07 | 3.58E-05 |
| MF | transcription regulatory region<br>sequence-specific DNA binding<br>(GO:0000976)                   | 301  | 14 | 1.03E-07 | 3.14E-05 |
| MF | sequence-specific double-stranded<br>DNA binding (GO:1990837)                                      | 321  | 14 | 2.18E-07 | 4.84E-05 |
| MF | double-stranded DNA binding<br>(GO:0003690)                                                        | 385  | 14 | 1.76E-06 | 3.30E-04 |
| MF | sequence-specific DNA binding<br>(GO:0043565)                                                      | 554  | 19 | 5.41E-08 | 2.64E-05 |
| MF | protein dimerization activity<br>(GO:0046983)                                                      | 265  | 9  | 2.16E-04 | 3.52E-02 |
| MF | DNA-binding transcription factor<br>activity (GO:0003700)                                          | 682  | 22 | 1.27E-08 | 1.55E-05 |

|                                              |                                                            |      |    |          |          |
|----------------------------------------------|------------------------------------------------------------|------|----|----------|----------|
| MF                                           | transcription regulator activity (GO:0140110)              | 782  | 22 | 1.31E-07 | 3.56E-05 |
| MF                                           | DNA binding (GO:0003677)                                   | 1405 | 33 | 4.75E-09 | 1.16E-05 |
| MF                                           | molecular function regulator (GO:0098772)                  | 1139 | 25 | 1.58E-06 | 3.21E-04 |
| MF                                           | nucleic acid binding (GO:0003676)                          | 2477 | 36 | 9.23E-05 | 1.61E-02 |
| CC                                           | nuclear chromatin (GO:0000790)                             | 155  | 10 | 4.47E-07 | 2.07E-04 |
| CC                                           | chromatin (GO:0000785)                                     | 204  | 12 | 7.92E-08 | 7.33E-05 |
| CC                                           | host cellular component (GO:0018995)                       | 122  | 6  | 3.94E-04 | 7.28E-02 |
| CC                                           | host cell (GO:0043657)                                     | 122  | 6  | 3.94E-04 | 6.07E-02 |
| CC                                           | host intracellular region (GO:0043656)                     | 122  | 6  | 3.94E-04 | 5.20E-02 |
| CC                                           | host cell nucleus (GO:0042025)                             | 122  | 6  | 3.94E-04 | 4.55E-02 |
| CC                                           | host intracellular membrane-bounded organelle (GO:0033648) | 122  | 6  | 3.94E-04 | 4.05E-02 |
| CC                                           | host intracellular organelle (GO:0033647)                  | 122  | 6  | 3.94E-04 | 3.64E-02 |
| CC                                           | host intracellular part (GO:0033646)                       | 122  | 6  | 3.94E-04 | 3.31E-02 |
| CC                                           | host cell part (GO:0033643)                                | 122  | 6  | 3.94E-04 | 3.03E-02 |
| CC                                           | nuclear chromosome (GO:0000228)                            | 226  | 10 | 1.11E-05 | 2.57E-03 |
| CC                                           | chromosome (GO:0005694)                                    | 355  | 13 | 3.88E-06 | 1.20E-03 |
| <i>Control: ST8-4xTMG1-5 vs TMG1-5xST8-4</i> |                                                            |      |    |          |          |

| Domain                                         | GO Term                                   | Ref<br>(#/20429) | DEG<br>(#/216) | Raw p-<br>value | FDR      |
|------------------------------------------------|-------------------------------------------|------------------|----------------|-----------------|----------|
| BP                                             | protein folding (GO:0006457)              | 163              | 11             | 5.59E-07        | 2.59E-03 |
| MF                                             | protein folding chaperone<br>(GO:0044183) | 14               | 4              | 1.79E-05        | 2.18E-02 |
| MF                                             | unfolded protein binding<br>(GO:0051082)  | 98               | 9              | 5.62E-07        | 1.37E-03 |
| CC                                             | No significant results                    |                  |                |                 |          |
| <i>Control: GY14-15xST8-4 vs ST8-4xGY14-15</i> |                                           |                  |                |                 |          |
| Domain                                         | GO Term                                   | Ref<br>(#/23710) | DEGs<br>(#/92) | Raw p-<br>value | FDR      |
| BP                                             | No significant results                    |                  |                |                 |          |
| MF                                             | No significant results                    |                  |                |                 |          |
| CC                                             | No significant results                    |                  |                |                 |          |

\*BP, MF, and CC represent biological process, molecular function, and cellular component domains, respectively.

**Table S2.** Gene Ontology (GO) terms overrepresented within sets of significantly ( $FDR < 0.05$ ) differentially expressed genes (DEGs) that are exclusive to each reciprocal hybrid pair with significant reciprocal effects compared to number of genes represented in reference set (Ref) of all detected genes across all samples in the experiment. Significance was tested based on Fisher's exact test with the false discovery rate (FDR) correction.

| <i>Significant reciprocal effects: Exclusive to ST8-2xGY14-15 vs GY14-15xST8-2</i> |                                                                                              |                  |                |             |                           |
|------------------------------------------------------------------------------------|----------------------------------------------------------------------------------------------|------------------|----------------|-------------|---------------------------|
| Domain*                                                                            | GO Term                                                                                      | Ref<br>(#/20429) | DEG<br>(#/25)  | Raw p-value | Adjusted p-value<br>(FDR) |
| BP                                                                                 | No significant results                                                                       |                  |                |             |                           |
| MF                                                                                 | No significant results                                                                       |                  |                |             |                           |
| CC                                                                                 | No significant results                                                                       |                  |                |             |                           |
| <i>Significant reciprocal effects: Exclusive to ST8-4x9930-3 vs 9930-3xST8-4</i>   |                                                                                              |                  |                |             |                           |
| Domain                                                                             | GO Term                                                                                      | Ref<br>(#/20429) | DEG<br>(#/126) | Raw p-value | FDR                       |
| BP                                                                                 | No significant results                                                                       |                  |                |             |                           |
| MF                                                                                 | RNA polymerase II cis-regulatory region sequence-specific DNA binding (GO:0000978)           | 157              | 10             | 8.19E-08    | 1.00E-04                  |
| MF                                                                                 | cis-regulatory region sequence-specific DNA binding (GO:0000987)                             | 158              | 10             | 8.67E-08    | 7.05E-05                  |
| MF                                                                                 | RNA polymerase II transcription regulatory region sequence-specific DNA binding (GO:0000977) | 174              | 10             | 2.03E-07    | 9.91E-05                  |
| MF                                                                                 | DNA-binding transcription factor activity, RNA polymerase II-specific (GO:0000981)           | 192              | 11             | 5.02E-08    | 1.22E-04                  |

|    |                                                                            |      |    |          |          |
|----|----------------------------------------------------------------------------|------|----|----------|----------|
| MF | regulatory region nucleic acid binding (GO:0001067)                        | 301  | 12 | 5.21E-07 | 1.82E-04 |
| MF | transcription regulatory region sequence-specific DNA binding (GO:0000976) | 301  | 12 | 5.21E-07 | 1.59E-04 |
| MF | sequence-specific double-stranded DNA binding (GO:1990837)                 | 321  | 12 | 1.00E-06 | 2.72E-04 |
| MF | double-stranded DNA binding (GO:0003690)                                   | 385  | 12 | 6.13E-06 | 1.25E-03 |
| MF | sequence-specific DNA binding (GO:0043565)                                 | 554  | 15 | 2.17E-06 | 4.82E-04 |
| MF | DNA-binding transcription factor activity (GO:0003700)                     | 682  | 18 | 2.75E-07 | 1.12E-04 |
| MF | transcription regulator activity (GO:0140110)                              | 782  | 18 | 1.87E-06 | 4.57E-04 |
| MF | DNA binding (GO:0003677)                                                   | 1405 | 27 | 1.27E-07 | 7.74E-05 |
| MF | molecular function regulator (GO:0098772)                                  | 1139 | 20 | 2.52E-05 | 4.73E-03 |
| CC | nuclear chromatin (GO:0000790)                                             | 155  | 9  | 7.80E-07 | 3.61E-04 |
| CC | chromatin (GO:0000785)                                                     | 204  | 11 | 9.01E-08 | 8.33E-05 |
| CC | nuclear chromosome (GO:0000228)                                            | 226  | 9  | 1.48E-05 | 3.42E-03 |
| CC | chromosome (GO:0005694)                                                    | 355  | 12 | 2.75E-06 | 8.48E-04 |

\*BP, MF, and CC represent biological process, molecular function, and cellular component domains, respectively
